# Supplementary material for: Malformations Caused by Shuni Virus in Ruminants, Israel, 2014–2015
Source: Emerg Infect Dis. 2015 Dec;21(12):2267–8. doi: 10.3201/eid2112.150804 (PMC4672418; doi:10.3201/eid2112.150804)
Supplement: Supplementary file 1 — Technical Appendix. Map showing locations where Shuni viruses were detected in ruminants in Israel, 2014–15, and phylogenetic trees of Simbu serogroup viruses. [file 15-0804-Techapp-s1.pdf]

# Malformations Caused by Shuni Virus in Ruminants, Israel, 2014–15

## Technical Appendix

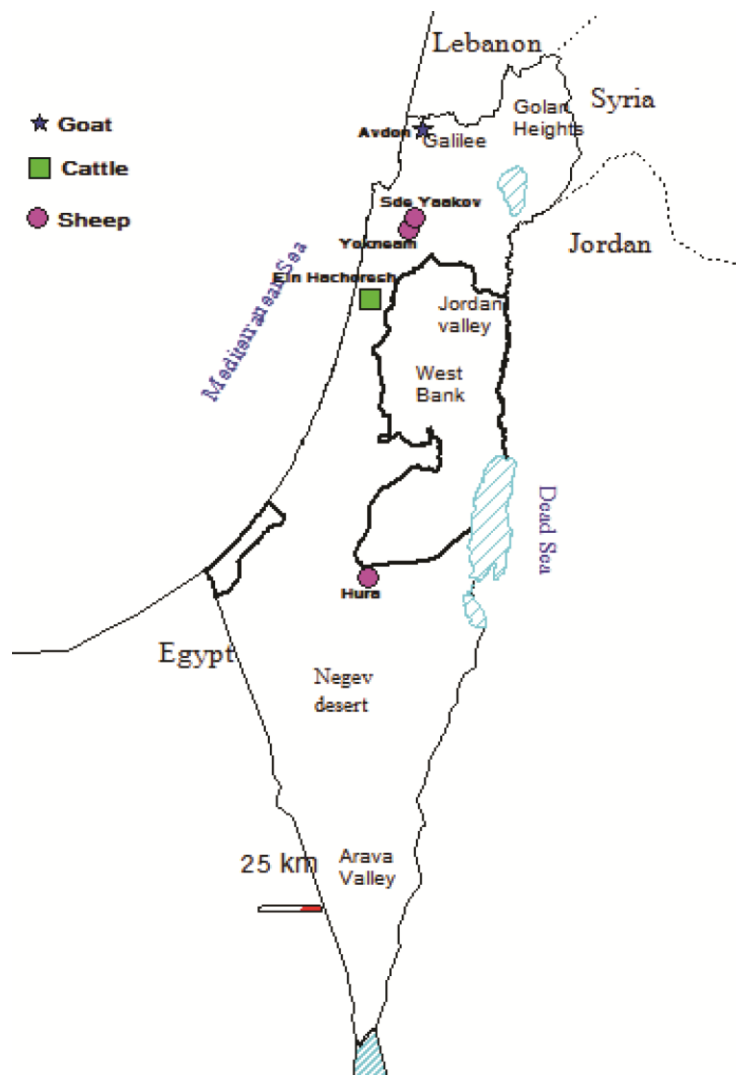

**Technical Appendix Figure 1.** Map showing locations where Shuni viruses were detected in ruminants in Israel, 2014–15. Scale bar indicates distance.

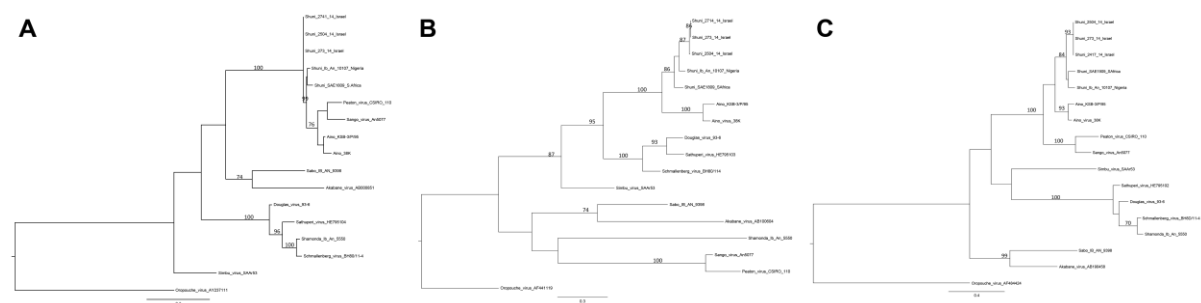

**Technical Appendix Figure 2.** Rooted maximum-likelihood phylogenetic trees of Simbu serogroup viruses. Segments were constructed on the basis of a general time-reversible and gamma-distributed rate heterogeneity (GTR\_G) model of nucleotide substitution. A) S segment; B) M segment; and C) L segment. Phylogenetic analysis was performed by using PhyML (1,2). Values above the branches indicate bootstrap support. Only bootstrap values >70% are shown. The segments of the Israeli isolates were compared with the appropriate sequences from validated Simbu viruses. When possible, we used Simbu serogroup viruses with available full-segment sequences that have been validated according to Goller et al. (3) and van Eeden et al. (4,5). For additional Aino viruses for which full-segment sequences were not available, we used GenBank accession numbers from previous studies (5,6). Homologous sequences from Oropouche virus were used as an out-group. Scale bar indicates estimated nucleotide substitutions.

## References

1. Dereeper A, Guignon V, Blanc G, Audic S, Buffet S, Chevenet F, et al. Phylogeny.fr: robust phylogenetic analysis for the non-specialist. *Nucleic Acids Res.* 2008;36:W465–9. <http://dx.doi.org/10.1093/nar/gkn180>
2. Guindon S, Gascuel O. A simple, fast, and accurate algorithm to estimate large phylogenies by maximum likelihood. *Syst Biol.* 2003;52:696–704. <http://dx.doi.org/10.1080/10635150390235520>
3. Goller KV, Höper D, Schirrmeier H, Mettenleiter TC, Beer M. Schmallerberg virus as possible ancestor of Shamonda virus. *Emerg Infect Dis.* 2012;18:1644–6. <http://dx.doi.org/10.3201/eid1810.120835>
4. van Eeden C, Williams JH, Gerdes TG, van Wilpe E, Viljoen A, Swanepoel R, et al. Shuni virus as cause of neurological disease in horses. *Emerg Infect Dis.* 2012;18:318–21. <http://dx.doi.org/10.3201/eid1802.111403>

5. van Eeden C, Harders F, Kortekass J, Bosser A, Venter M. Genomic and phylogenetic characterization of Shuni virus. *Arch Virol.* 2014;159:2883–92.  
<http://dx.doi.org/10.1007/s00705-014-2131-2>
6. Yanase T, Aizawa M, Kato T, Yamakawa M, Shirafuji H, Tsuda T. Genetic characterization of Aino and Peaton virus field isolates reveals a genetic re-assortment between these viruses in nature. *Virus Res.* 2010;153:1–7. <http://dx.doi.org/10.1016/j.virusres.2010.06.020>
